# Supplementary material
Source: PubMed Central journal article supplement (PMC5173473)
Supplement: supp_4.4.E588_2016-0031-1-at.pdf [file supp_4.4.E588_2016-0031-1-at.pdf]

**Appendix 1 (as provided by the authors):** Characteristics of the interventions<sup>1</sup>  
(reproduced under Creative Commons Attribution License 4.0 International).

|                                                 |                                                                                                                                                                                                                                                                                                                                                                                                                                                                                                               |
|-------------------------------------------------|---------------------------------------------------------------------------------------------------------------------------------------------------------------------------------------------------------------------------------------------------------------------------------------------------------------------------------------------------------------------------------------------------------------------------------------------------------------------------------------------------------------|
| <b>CDPM practitioner training</b>               | <p>Theoretical training on:</p> <ul style="list-style-type: none"><li>- Motivational interviewing</li><li>- Function of the respiratory system</li><li>- Function of the cardiovascular system</li><li>- Diabetes</li><li>- Risk factors</li><li>- Existing CDPM services</li></ul> <p>Practical training:</p> <p>Three-week mentoring in specialized CDPM services facilities.</p>                                                                                                                           |
| <b>Preliminary clinical evaluation</b>          | <p>The clinical evaluation of participants includes:</p> <ul style="list-style-type: none"><li>Anthropometric characteristics</li><li>Medical history</li><li>Medication</li><li>Functions (respiratory, cardiovascular, endocrine, gastrointestinal)</li><li>Lifestyle habits and risk factors</li><li>Patient's preoccupations and objectives</li><li>Previous interventions (nutrition, physical activity, respiratory, smoking cessation),</li><li>Recent changes (weight, alcohol consumption)</li></ul> |
| <b>Disciplines involved in the intervention</b> | <p>The interventions, based on a referral from a family physician or nurse, are provided by professionals in the following disciplines:</p> <ul style="list-style-type: none"><li>Clinical coordination</li><li>Nursing</li><li>Physical activity therapy</li><li>Nutrition</li><li>Respiratory therapy</li><li>Smoking cessation therapy</li></ul>                                                                                                                                                           |
| <b>Implemented interventions</b>                | <p>The interventions implemented are:</p> <ul style="list-style-type: none"><li>Self-management support</li><li>Education on diseases (diabetes, COPD, asthma,</li></ul>                                                                                                                                                                                                                                                                                                                                      |

cardiovascular)  
Education on risk factors (pre-diabetes, high blood pressure, dyslipidemias, obesity, physical inactivity, smoking)  
Counseling on medication  
Motivational interviewing  
Education about nutrition  
Education about physical activity  
Counseling on smoking cessation

**Tools and support material** Each intervention is supported by print and other material to ensure that patient engagement is maintained even between the interventions. These include documents on:

Chronic disease management  
Asthma, COPD  
Diabetes  
Cardiovascular  
Metabolic syndrome  
Hypo/hypertension  
Tools for smoking cessation  
Stress management  
Blood pressure monitoring journal  
Personal objectives journal  
Physical activity journal

**Communication & coordination** The CDPM practitioners in our study work within primary care settings which enhances communication with primary care physicians, nurses and staff. The clinical coordinator ensures optimal communication and transition of care between the project team, the primary care professionals and specialized services. Special attention is given to the distinction of tasks fulfilled by project CDPM practitioners and tasks fulfilled by primary care nurses.

**Integration** Prior to the implementation of interventions, a pre-implementation evaluation is conducted to identify the needs for CDPM services and the contextual factors of the participating PC clinics in the follow-up of CD patients. The pre-implementation evaluation of the project promotes the sharing of a common positive vision of an intervention that focuses on prevention, earlier support for patients in the course of their disease, interprofessional collaboration, services integration, motivational

interviewing and self-management support.

**Participating primary care professionals** Participating primary care professional include:  
Family physicians (63)  
Nurses (5)

Participating primary care settings:

Four (4) clinics  
Four (4) family medicine groups

**Participating specialists** Participating specialists include:

Cardiologists  
Internal medicine specialists  
Endocrinologists  
Pneumologists

## Reference:

1. Fortin M, Chouinard MC, Bouhali T, et al. Evaluating the integration of chronic disease prevention and management services into primary health care. *BMC Health Serv Res* 2013;13:132.

Subjects who had a reliable improvement in the self-management domains.

| <b>Domain (heiQ)</b>                                | <b>Subjects with reliable improvement, n (%)</b> |                                  |
|-----------------------------------------------------|--------------------------------------------------|----------------------------------|
|                                                     | <b>Intervention<br/>(Total = 166)</b>            | <b>Control<br/>(Total = 166)</b> |
| <b>Health directed behaviour</b>                    | 48 (28.9)                                        | 28 (16.9)                        |
| <b>Positive &amp; active<br/>engagement in life</b> | 31 (18.7)                                        | 21 (12.7)                        |
| <b>Emotional wellbeing</b>                          | 38 (22.9)                                        | 22 (13.3)                        |
| <b>Self-monitoring and insight</b>                  | 24 (14.5)                                        | 10 (6.0)                         |
| <b>Constructive attitudes and<br/>approaches</b>    | 36 (21.7)                                        | 15 (9.0)                         |
| <b>Skill and technique<br/>acquisition</b>          | 51 (30.7)                                        | 30 (18.1)                        |
| <b>Social integration &amp;<br/>support</b>         | 23 (13.9)                                        | 20 (12.0)                        |
| <b>Health service navigation</b>                    | 29 (17.5)                                        | 15 (9.0)                         |

Other variables in Intervention and Control groups at baseline and after 3 months.\*

|                     | Group        | Baseline |               | 3 months |               | Mean difference (Baseline vs. 3 months) |                                | p*** |
|---------------------|--------------|----------|---------------|----------|---------------|-----------------------------------------|--------------------------------|------|
|                     |              | n        | Mean (SD)     | n        | Mean (SD)     | Within group*                           | Between-groups**;<br>Cohen's d |      |
| <b>Score SEM-CD</b> | Intervention | 153      | 7.5 (1.8)     | 152      | 8.0 (1.6)     | 0.5 (0.3 to 0.8)                        | 0.2 (-0.1 to 0.5);             | 0.21 |
|                     | Control      | 160      | 7.3 (2.0)     | 158      | 7.7 (1.7)     | 0.4 (0.2 to 0.6)                        |                                |      |
| <b>PCS</b>          | Intervention | 155      | 42.7 (9.7)    | 155      | 45.8 (9.3)    | 3.1 (1.8 to 4.4)                        | 1.6 (0.2 to 3.1);              | 0.03 |
|                     | Control      | 161      | 44.6 (10.6)   | 160      | 45.4 (10.0)   | 0.9 (-0.1 to 1.8)                       |                                |      |
| <b>MCS</b>          | Intervention | 155      | 46.7 (10.7)   | 155      | 49.8 (9.9)    | 3.1 (1.7 to 4.5)                        | 1.1 (-0.5 to 2.7);             | 0.19 |
|                     | Control      | 161      | 47.9 (10.8)   | 160      | 49.4 (9.4)    | 1.5 (0.3 to 2.9)                        |                                |      |
| <b>SF-6D</b>        | Intervention | 154      | 0.683 (0.131) | 153      | 0.729 (0.134) | 0.044 (0.026 to 0.062)                  | 0.021 (0.00 to 0.043); 0.00    | 0.05 |

|                                   |              |     |                  |     |                  |                            |                                |
|-----------------------------------|--------------|-----|------------------|-----|------------------|----------------------------|--------------------------------|
|                                   | Control      | 160 | 0.715<br>(0.129) | 159 | 0.729<br>(0.126) | 0.012 (-0.002<br>to 0.026) |                                |
|                                   | Intervention | 152 | 32.0<br>(7.2)    | 148 | 31.5<br>(7.4)    | -0.31 (-0.95<br>to 0.46)   | -0.27 (-1.14 to<br>0.61); 0.04 |
| <b>BMI<br/>(Kg/m<sup>2</sup>)</b> | Control      | 155 | 31.2<br>(7.0)    | 157 | 31.2<br>(6.8)    | 0.02 (-0.42 to<br>0.53)    | 0.55                           |

\* Mean with 95% confidence interval. Mean difference = mean score 3 months – mean score Baseline.

\*\* Mean with 95% confidence interval. Mean difference = adjusted mean 3 months ‘Intervention’ – adjusted mean 3 months ‘Control’.

\*\*\* ANCOVA comparing scores after 3 months, adjusted for baseline.

SEM-CD = Self-Efficacy for Managing Chronic Disease; HRQoL = Health Related Quality of Life; PCS = Physical Component Summary of SF-12v2; MCS = Mental Component Summary of SF-12v2; SF-6D = Single index of SF-12v2; BMI = Body Mass Index.
